Qualitative and quantitative analyses of tree forking habit with single-image photogrammetry: a case study of old-growth temperate oaks in a mixed, deciduous forest remnant near Krakow, Poland

Kamil Kędra

5 e-mail: k.w.kedra@gmail.com

Abstract

Tree forking is both ecologically and economically relevant, but remains much understudied. Here, thirty old-growth temperate oaks (*Quercus robur* or *Q. petraea*) forking habit was analysed with the  
10 single-image photogrammetry (SIP); in a north-exposed mixed, deciduous forest remnant (near Krakow; Poland). A new classification of mature oak architectures was proposed, based on the original Hallé-Oldeman model, with modified locations of the main branches and presence or absence of bifurcation in the main stem. Two of the models were most clearly represented by the studied oaks. It was found that the trees tended to either keep branches at varying heights, with no  
15 forks; or to iterate forking, with no major (non-fork) branches below the first fork. The quantitative analysis confirmed the applicability of the branch to parent stem diameter ratio to define a fork. Branching ratio was positively correlated with both tree diameter and height of a branch above the ground, which is consistent with a previous study, based on much younger trees. It is concluded, that  
20 played the key role in the studied oaks forking habit. The SIP method enabled valuable insights into the large oaks' forking, both at the tree and branch levels; and may be further employed to study mature trees' bifurcation patterns. Based on this study, some possible improvements to the methodology were discussed.

25 Keywords: Temperate deciduous forest; Tree architecture; Forking pattern; Single-image photogrammetry (SIP); Hallé-Oldeman models

## 1 Introduction

Bifurcation or forking is an important feature of tree branching systems, leading to the  
30 formation of two, more or less equivalent, axes instead of a single monopodial axis. Despite the large  
economical and ecological consequences, quantification of tree forking (TF) has gained surprisingly  
little attention from the research community (Colin et al., 2012). The cited paper seems to provide  
the first quantitative analysis of TF ever made, and in spite of rising both vital and intriguing scientific  
35 issues about TF, up to now it has not been discussed. The authors presented a study of young (up to  
23 years old) sessile oak (*Quercus petraea* (Matt.) Liebl.) forking, in three oak plantations of varying  
initial stand densities. It was found that TF was most common in the lowest density site; and number  
of forks per tree increased with tree girth, tree height and age. The causes of forks (Barthélémy &  
Caraglio, 2007; Bell, 1991; Chaar & Colin, 1999; Collet et al., 2011; Hallé et al., 1978; Ningre & Colin,  
2007), either shoot-level (traumatic) or tree-level (metamorphic), were not clearly distinguished. The  
40 authors concluded, that this was probably because the trees under study were too young to observe  
the final architectural patterns; or because those patterns were only weakly pronounced and still, the  
traumatic TF causes dominated (Colin et al., 2012). Some other studies aimed at general classification  
of young trees as forked or not (Jensen & Löf, 2017; Kuehne et al., 2013), according to the predefined  
global tree models. However, both quantitative and qualitative analyses of TF are probably  
45 completely lacking in the case of large, old trees. This lag may be linked to the fact, that the rapidly  
developing remote sensing techniques for tree architectural inventory (Liang et al., 2019), has not yet  
been applied to analyse older trees' bifurcation patterns.

Forking is most noticeable in tree species "normally" exhibiting a single, monopodial trunk.  
The distinction between sympodial or monopodial growth pattern is the key question in the famous  
50 Hallé-Oldeman (HO) architectural classification (Bell, 1991; Hallé & Oldeman, 1970; Hallé et al.,  
1978). Among the 23 HO models, elaborated to describe the diversity of tropical plants' architectures  
(Hallé et al., 1978), the Rauh's model (named after the German biologist Werner Rauh) seems to  
retain the largest monopodial tree species representation in Europe, encompassing taxa of such  
wide-spread genera as *Quercus*, *Pinus*, *Picea* and *Acer* (Fig. 1). Generally, the Rauh's model describes  
55 light demanding and early-successional species. The trees of the complex *Quercus robur* L. / *Q.*  
*petraea* (Matt.) Liebl. (Gomory et al., 2001), here referred to as *Q. robur sensu lato* (oaks), are of  
major importance in forestry (Saenz-Romero et al., 2017); while being prone to forking (Colin et al.,  
2012), e.g., because of specific wood properties, such as the ability to form tortuous grain pattern,  
interlocking the forked junctions (Slater & Ennos, 2015). This and other traits, that contribute to tree

60 plasticity in relation to local growth environment, make the original architectural “blueprint” (Rauh’s model) hardly recognisable at the scale of whole mature or old-growth oak trees (Oldeman, 1990). Therefore, it is worthwhile to test whether any other architectural pattern or patterns may be useful for describing older oak trees.

This study was conducted in an old-growth, oak-lime-hornbeam, north-exposed small forest  
65 remnant, where many of the target oak trees exhibited forking. The following objectives were addressed:

1. Define and test the possible architectural patterns of mature and old oaks, including forking habit, as a modification of the original (Rauh’s) model;
2. Develop new ways to quantitatively analyse and describe large trees’ forking, with an image-based  
70 remote sensing method.

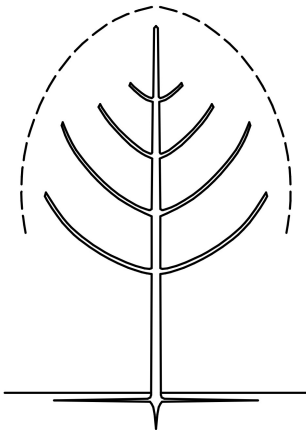

Fig. 1 A simplified Rauh’s model (Hallé et al., 1978), showing its main characteristics: monopodial  
75 trunk and rhythmic, orthotropic branching

## 2 Methods

### 2.1 Study area and tree sampling

The site (Krzyszkwice Forest) is located within a local hill (ca. 120 ha area, ca. 65 m relative  
80 height: between 220 and 285 m a.s.l.), in the vicinity (SE) of Krakow, Southern Poland (50°0'3.14"N;  
20°0'41.2"E). The loess-mantled hill has an elongated shape, along the longitudinal direction; with  
the northern (larger) and western (smaller) slopes covered with the forest (ca. 34 ha); while the  
southern and eastern slopes are mainly covered with discontinuous urban fabric and agricultural  
areas (Urban Atlas 2012: <<https://land.copernicus.eu/local/urban-atlas/urban-atlas-2012>>). This is  
85 one of the few old-forests within the urbanized district; those forest remnants mostly occur in the  
form of small, isolated "islands", and usually subjected to some kind of nature or landscape  
protection. The Krzyszkwice Forest is under a partial protection (since 1998) to preserve the mixed,  
deciduous oak-lime-hornbeam forest (*Tilio-Carpinetum*), and valuable fauna and flora, including relict  
mountain plants' locations (Gazda & Gazda, 2010). The loess-mantled soils are fertile, and prone to  
90 erosion, as indicated by two distinct gullies within the forested area. This site was previously  
described, in less detail, in the conference paper by Kędra et al. (2016), focusing on inter-tree  
competition, and other external factors influencing oaks' crown radii and the overall crown size and  
shape.

The whole site is covered with a network of permanent, circular plots (0.05 ha each),  
95 regularly spaced (see Kędra et al. (2016) for a map). The plots were established in 2007 (Gazda Anna,  
personal communication), and are individual tree-centred, with 30 plots targeting at mature oaks,  
with diameter at breast height (DBH) larger than 40 cm. Those trees were used in this study, as well  
as in Kędra et al. (2016). Here, however, the oaks were classified as being of the *Quercus robur*/*Q.*  
*petraea* complex, instead of *Q. robur sensu stricto*. This more general approach is correct in the  
100 presence of both oak species within the forest, their frequent hybridization (Gomory et al., 2001),  
and lack of genetic identification of the individuals. The target trees median DBH was 53 cm. The  
exact age of those trees is not known, however, they are estimated to be between 140 and 160 years  
old. The neighbourhood (other trees and shrubs growing within the plots) included several deciduous  
tree species, mainly: silver birch (*Betula pendula* Roth), common hornbeam (*Carpinus betulus* L.),  
105 oaks, sycamore maple (*Acer pseudoplatanus* L.), small-leaved lime (*Tilia cordata* Mill.), and wych elm  
(*Ulmus glabra* Huds.). The mean density of trees and shrubs (with DBH of at least 7 cm) was 24±7  
individuals per plot (480±140, up-scaled to individuals per hectare); and mean basal area was

1.75±0.46 m<sup>2</sup> per plot (35±9 m<sup>2</sup>/ha). The plots were characterized by varying local terrain slopes (3.5±3.3°).

110

## 2.2 Image acquisition

The single-image photogrammetry (Gazda & Kędra, 2017; Kędra et al., 2019), requires one, high resolution photograph per tree. At the moment of image taking, the whole branching system is flattened at once, in relation to a theoretic “projection plane”. Therefore, the place from which the image is to be taken, needs to be carefully selected. The main concept is to capture the  
115 representative crown profile; this usually means to capture the largest crown asymmetry; or the largest crown horizontal extent (if the tree of interest was not visibly inclined in any direction). Here, the following protocol was utilized: first, examining the tree crown from below (standing next to the stem) to determine the major direction of the crown development. The trees were never perfectly  
120 symmetrical and it was always possible to point such direction, and note the azimuth. Second, subtracting and adding 90 degrees from and to the azimuth (respectively) to determine two possible directions of the image to be taken. Third, choosing between the two possible (opposite) image directions, to assure the best possible visibility (lowest occlusion) of the whole branching system. Finally, taking the photograph, with specific settings: distance from the target tree and camera tilt  
125 (keeping in mind that decreasing the distance and increasing the tilt angle may negatively affect the measurement accuracy (Gazda & Kędra, 2017)). The noted settings were further used to transform the images from non-metric to metric ones, with the QGIS software v.2.8.9 (QGIS Development Team, 2016).

## 130 2.3 Qualitative analysis

The original Rauh’s model (Fig. 2, R.A) implies that the main tree axis (monopodial trunk) contributes to the vertical tree extent; while the lowest branches (of equal insertion height) are the main branches, that contribute to the horizontal crown extent. Three variants of the original model were developed (Fig. 2, R.B-D), which account for modifications in the main trunk (forking) and/or  
135 the main branches’ insertion heights. The model R.B maintains the monopodial trunk, but the main branches are of unequal insertion height (e.g. because of branch mortality in low light conditions). The models R.C and R.D both account for TF, however, in the former, only one of the two main

branches is affected by forking (the other branch is located below the fork); while in the latter, both main branches (and the whole crown) are affected by TF. The architectures of the target oaks were  
140 carefully analysed, with the use of photographs taken (as described in the previous section), and according to the presented models (R.A-D).

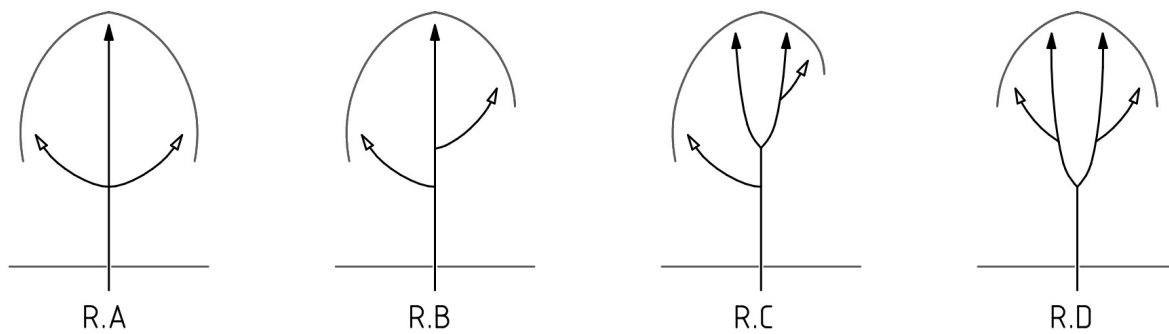

Fig. 2 The original Rauh's model (R.A), and its modifications (R.B-D), black arrows denote axes that  
145 contribute to the vertical tree extent, and the empty arrows denote main branches, which contribute to the horizontal crown extent

## 2.4 Quantitative analysis

### 2.4.1 Extraction of fork-related variables

#### 150 *Branch sampling*

Thirty trees were under study; therefore, the aim was to analyse 60 main branches (two per tree), in terms of the variables (architectural traits) that may potentially describe and define branches as forked or not in a quantitative manner. Only the main branches were considered, that is, those which contributed to the horizontal crown extent, within the selected projection plane. The set  
155 of considered traits included: (1) branch diameter (or branch thickness, BT), (2) the corresponding main stem diameter (or stem thickness, ST), (3) the ratio between BT and ST (branching ratio, BR), (4) branch insertion point height above the ground level (branch height, BH), branch angles: (5) in relation to the main stem position (relativeBA), (6) in relation to the vertical direction (absoluteBA), (7) the difference between relativeBA and absoluteBA (deltaBA1), and (8) the modulus of deltaBA1  
160 (deltaBA2). The measurements of the traits (1-4) were taken with the ArchiCAD software

<<https://myarchicad.com/>>, and the branching angles were measured in the LibreCAD (open source) software <<https://librecad.org/>>.

### *Branch and stem diameters*

165 The diameter measurements, including DBH, were analogous to Kędra et al. (2019); however, here the branch and parent stem diameters were measured at the distance of 1 m from the branch insertion point, instead of the 0.5 m distance used in that study (because the trees here were larger, with thicker branches: the DBH of target trees here was approximately twice larger than the DBH of that study's trees).

### *Branching ratio*

170 The relation between the branch diameter and the parent stem diameter (branching ratio, BR) has been used to quantitatively define a fork (Colin et al., 2012; Ningre, 1997). BR may take a range of values: between more than zero and one; BR lower than 1/2 denotes a small branch; BR between 1/2 and 2/3 denotes a large branch; and BR larger than 2/3 defines a fork, while the values closer to the 2/3 threshold reveal asymmetric forks, and BRs close to 1:1 indicate a true fork,  
175 resulting in two equal axes (Ningre, 1997). Here, branching ratios were calculated for all branches that contributed to horizontal crown extent and underwent diameter measurements.

### *Branch height*

Colin et al. (2012) found that higher trees may have more forked junctions in the branching system, than the lower trees; therefore, it was suspected that branches located higher in the tree  
180 were more prone to forking than the lower-located branches. Herein, the branch height (BH) was measured as the vertical distance between each tree's base point and each branch axis intersection point with the main stem axis (branch insertion point). It is stressed, however, that BH cannot be regarded as the height of the first (lowest) branch, which has been used in several studies as the location of live-crown base, e.g. (Burkardt et al., 2019); because some minor (but vital) branches  
185 could be present, below the main branches, in case of each analysed tree.

### *Branch angles*

Generally, forked branches are thought to have a more upright position than the non-forked branches. Branching angle measurements have gained much attention from the research community, dealing with remote sensing of tree architecture (Bayer et al., 2013; Burkardt et al.,

190 2019; Kędra et al., 2019; Pyorala et al., 2018). This type of traits proved to be useful for examining  
the effects of tree species mixing (Bayer et al., 2013). However, it seems that there is no widely  
accepted protocol on branch angle mensuration. Several ways to measure this trait were proposed,  
including the relative angle, between the branch and the parent stem (Kędra et al., 2019), and the  
“absolute” angle, between the branch direction and the vertical direction (Bayer et al., 2013). Here,  
195 both the relative and absolute branch angle measures were used, as well as the differences between  
both of them, which represent the level of local inclination of the main stem; to see which of those  
traits has the highest potential to discriminate a forked from a non-forked branch.

#### 2.4.2 Statistical methods

200 The variables were examined according to the standard methods for probability distribution  
estimation (histograms and probability density curves). The traits were split into two groups, with  
regards to forked or non-forked branches, as defined in terms of the qualitative assessment. To test  
whether those traits may differentiate the forked branches from the non-forked ones, a Kruskal-  
Wallis nonparametric test was used, with the null hypothesis stating that both groups of each  
205 variable come from populations with the same distribution. This test requires homoscedasticity in  
the data, and this was checked with the Levene’s test, in the R package “car” (Fox & Weisberg, 2019).  
When heteroscedasticity was found, Welch’s test for heteroscedastic data was used. Finally, the  
correlation analysis was performed to determine the monotonic relationships among the  
architectural variables and between those traits and the general measure of tree size, here  
210 represented by DBH. The results were plotted with the use of the “corrplot” package in R (Wei &  
Simko, 2017). All statistical analyses were performed with R v.3.2.3 or v.3.4.1 (R Core Team, 2017).

### 3 Results and discussion

#### 3.1 Qualitative results

215 The main criterion of the proposed architectural classification was whether the analysed  
main branches were fork-related or non-fork-related. Keeping only this in mind, almost all the trees  
could be definitely assigned to the presented models: R.A-D (except for a single tree, see Fig. S1,  
model R.C, tree number 5). However, when considering the second criterion in the models R.A and  
R.B, i.e. constantly monopodial stem above the two main branches, some trees failed to be assigned



220 to those models, as there were considerable bifurcations in the upper part of the stems. Therefore,  
two “forked” submodels were added: R.Af and R.Bf, to include those trees in the general  
classification. Not a single tree fully conformed to the original Rauh’s model; and only two trees had  
the two main branches with overlapping bases, while exhibiting forking of the main axis above the  
main branches (Fig. 3). The three models: R.B, R.C and R.D, were similarly represented (between 23  
225 and 30% of all trees). However, four other trees were classified under the R.Bf model, and when  
those trees were pooled together with the R.B model trees, then this architectural type (fork-  
unrelated main branches, at varying heights) dominated considerably (40% of all trees). Five trees  
(55%) of the R.D model had some minor or dead branches (seemingly once being major branches)  
below the fork (Fig. 4a), suggesting that the R.C model trees might present a tentative state (which  
230 may change to R.D model in the future). Furthermore, the R.Af and R.B/Bf trees could also turn to  
the R.D model with time, as exemplified by one distinct reduction of the main tree axis in the  
presence of two main branches close to each other, leading to the formation of a pseudo-fork (Fig.  
4b). On the other hand, forks may also be reduced to single axes, which was observed in the case of a  
single tree; low in the crown (6.2 m above the ground, which was the minimal BH of this study; Fig.  
235 4c). Most of the R.D trees exhibited repeated forking of the axes coming from a fork below. This may  
suggest that there were some global, tree-level factors, underlying this forking habit, rather than  
single shoot-level traumatism. Supplementary Figure 1 presents all trees, and their classification to  
the qualitative models (summarized in Tab. 1).

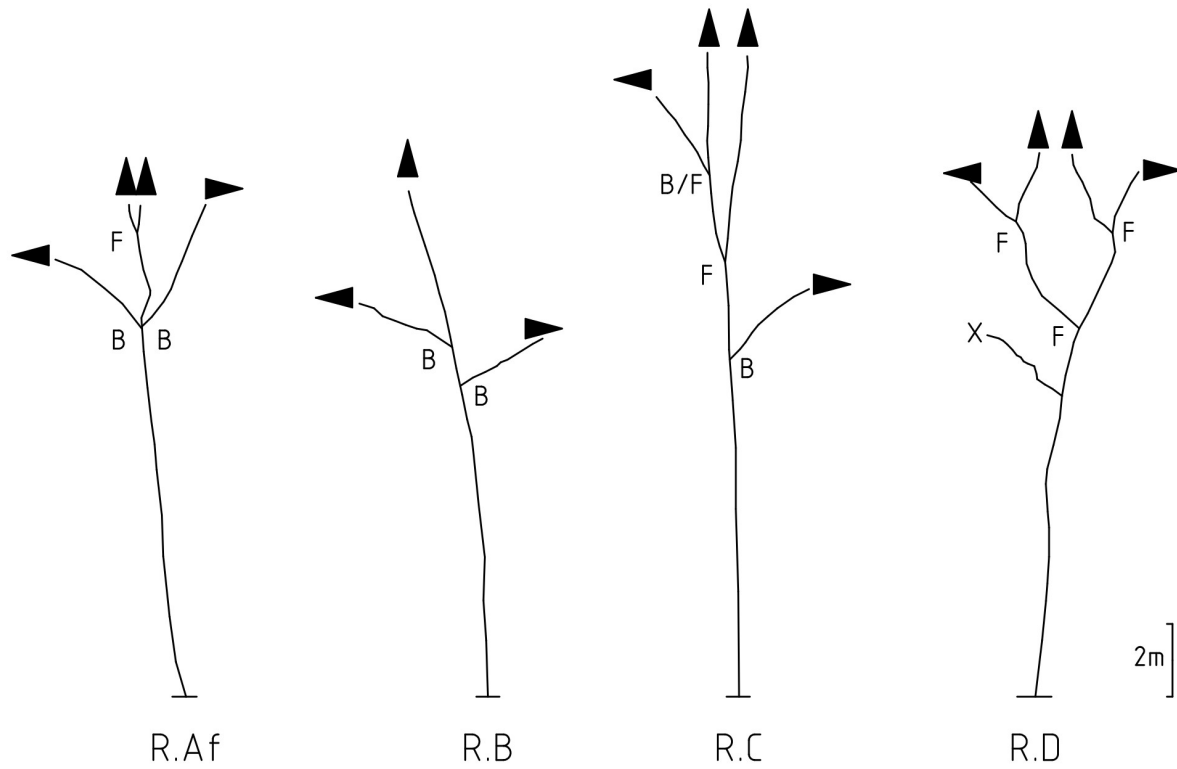

Fig. 3 The most typical examples of actual branching systems, digitized with SIP, conforming to the proposed qualitative models (R.A-D); only the main axes and main branches were shown; B=non-forked branch, F=forked branch, X=dead branch

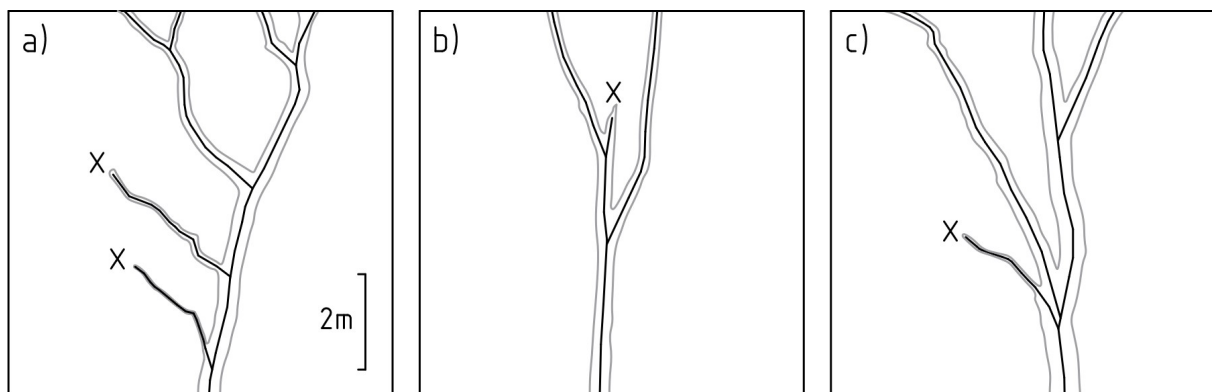

Fig. 4 Three different types of axes reduction (X): a) reduction of branches below a fork; b) pseudo-fork formation by reduction of the main axis; c) one of the axes that once formed a fork was reduced, instead, a branch was formed later (next to the right); the scale is constant for a)-c)

250 3.2 Quantitative results

Fifty three branches were analysed in detail (see Fig. S2); seven cases were excluded from this analysis, because there was no considerable, or well visible, ramification of the main axis; in such cases it was assumed, that the main axis contributed both to the vertical and horizontal crown extent. Further 15 branches were excluded from measurements, mostly because there was another  
255 branch (or branches) within the distance of 1 m from the target branch insertion point; or the analysed branch was occluded by another one or the stem. In several cases the measurement was preceded by adjustment of the measurement radius (by 10 or 20 cm). Finally, a set of 38 branches underwent measurement of all described traits (Tab. 1); which included 24 non-forked branches and 14 forked branches (as determined qualitatively).

260

Table 1 Summary of the qualitative results and branch sampling

| Model | Number of trees | Number of branches | Measured branches | % measured branches |
|-------|-----------------|--------------------|-------------------|---------------------|
| R.Af  | 2               | 4                  | 0                 | 0                   |
| R.B   | 8               | 16                 | 13                | 81                  |
| R.Bf  | 4               | 8                  | 6                 | 75                  |
| R.C   | 7               | 13                 | 11                | 85                  |
| R.D   | 9               | 12                 | 8                 | 66                  |
| Total | 30              | 53                 | 38                | 72                  |

Most of the variables had notably right-skewed distributions (Fig. 5). The most bimodal-like distribution was found in the case of branching ratio (BR, Fig.5c); this may suggest that the  
265 mechanisms underlying forked and non-forked branches formation differ. Obviously, BR was the best fork/non-fork-disentangling trait; confirming that BR is a suitable fork-defining variable. Furthermore, slight symptoms of a second peak in the probability distribution curves were observed in case of branch diameter (BT, Fig.5a), relative branch angle (relativeBA, Fig.5e) and deltaBAs (Fig.5g,h).

The Levene's test revealed heteroscedasticity in case of BR and deltaBA2; while deltaBA1 was  
270 close to violation of the Kruskal-Wallis test's homoscedasticity assumption (Tab. 2). Therefore, Welch's anova test was used to look for differences between fork and non-fork groups of that

variables. This was found in case of four traits, namely: branch diameter, stem diameter, branching ratio and branch insertion height (Fig. 6a-d). Interestingly, none of the angular measures significantly differentiated the forked from the non-forked branches. This was probably because of the relatively short distance, at which the angles were measured (1 m, in most cases), when the forked branches reached their upright positions further away from the branch insertion points.

The Spearman's correlation analysis (Fig. 7) showed that the branching ratio was positively correlated with tree size (DBH;  $r_s=0.380$ ,  $p=0.012$ ), branch diameter (BT;  $r_s=0.801$ ,  $p<0.001$ ) and branch height (BH;  $r_s=0.578$ ,  $p<0.001$ ); while it was negatively correlated with the parent stem diameter of a branch (ST;  $r_s=-0.569$ ,  $p<0.001$ ). The fact that fork prevalence, in the studied oaks, increased both with tree size and height of branches above the ground level, remains in agreement with the previous study of Colin et al. (2012), based on much younger trees. Furthermore, an insight into why branching ratio well describes forked branches was provided: the forked branches were thicker than the non-forked ones, while the corresponding main stem was generally thinner in case of the former branches (which may be linked to the observation, that they occurred higher in the stem); after all, the ratio between BT and ST only emphasized the differentiations provided by the both variables alone. The angular measures were not significantly correlated with BR; however, it is noticed that absoluteBA and deltaBA1 were seemingly more related with BR than relativeBA and deltaBA2; and probably could become more useful in such analysis when the way of measurement would be modified as described above; or if the sample size was larger.

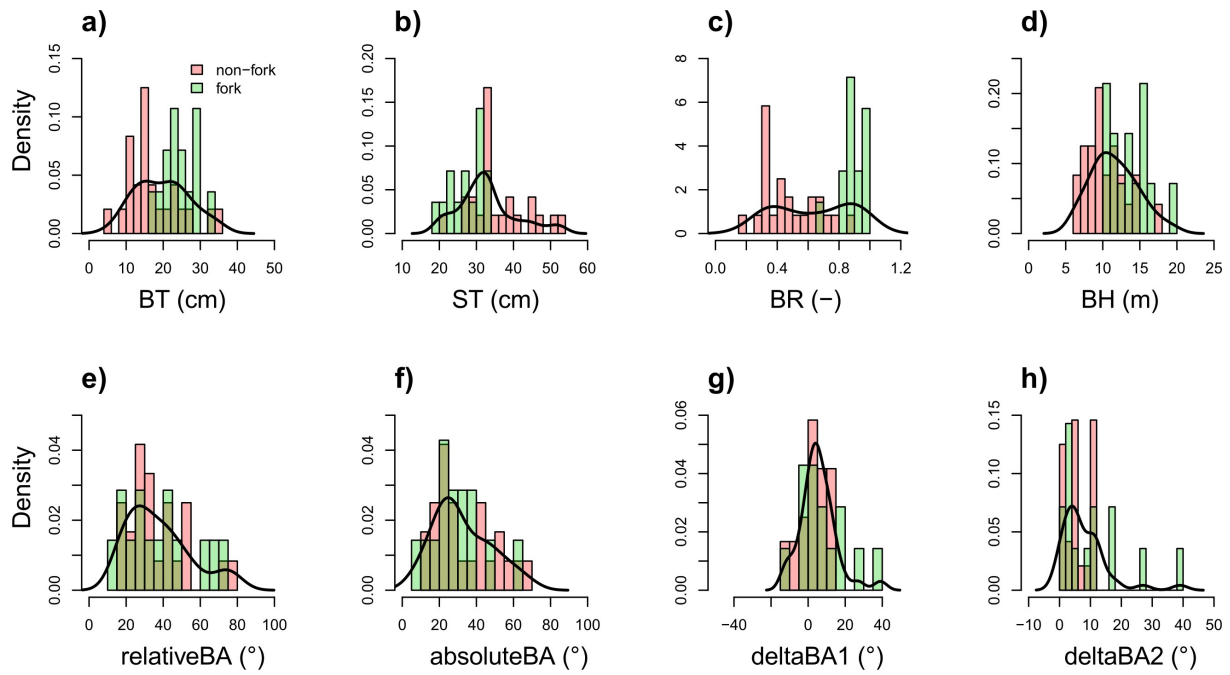

Fig. 5 Histograms and probability density curves for the analysed architectural traits; bins corresponding to the forked branches are in green, and the bins for non-forked branches are in red; the fills are partly transparent to show whether they overlap or not

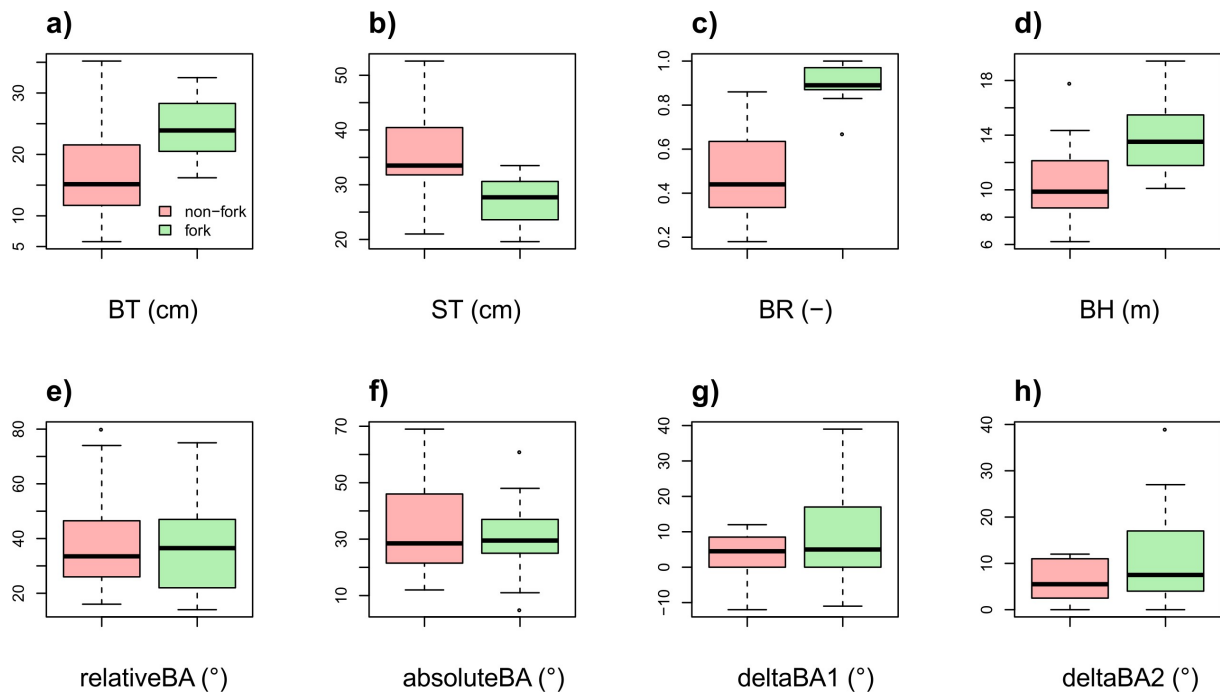

Fig. 6 Box plots for the analysed architectural traits; boxes corresponding to the forked branches are in green, and the boxes for non-forked branches are in red; the plots represent the following statistics: minimum, first quartile, median, third quartile, and maximum

Table 2 Results of the Levene's, Kruskal-Wallis and Welch's tests; Df\_denom is the degrees of freedom denominator; the statistically significant differences were denoted by bold font

| Variable   | Levene       |              | Kruskal-Wallis |                  | Welch         |               |                  |
|------------|--------------|--------------|----------------|------------------|---------------|---------------|------------------|
|            | F-value      | p-value      | $\chi^2$       | p-value          | F-value       | Df_denom      | p-value          |
| BT         | 1.372        | 0.249        | <b>10.097</b>  | <b>0.001</b>     |               |               |                  |
| ST         | 1.528        | 0.225        | <b>13.194</b>  | <b>&lt;0.001</b> |               |               |                  |
| BR         | <b>7.930</b> | <b>0.008</b> |                |                  | <b>90.713</b> | <b>34.619</b> | <b>&lt;0.001</b> |
| BH         | 0.012        | 0.913        | <b>10.681</b>  | <b>0.001</b>     |               |               |                  |
| relativeBA | 0.542        | 0.467        | 0.000          | 0.988            |               |               |                  |
| absoluteBA | 1.113        | 0.299        | 0.155          | 0.694            |               |               |                  |
| deltaBA1   | 3.810        | 0.059        | 1.001          | 0.317            | 2.002         | 17.123        | 0.175            |
| deltaBA2   | <b>6.038</b> | <b>0.019</b> |                |                  | 2.604         | 15.252        | 0.127            |

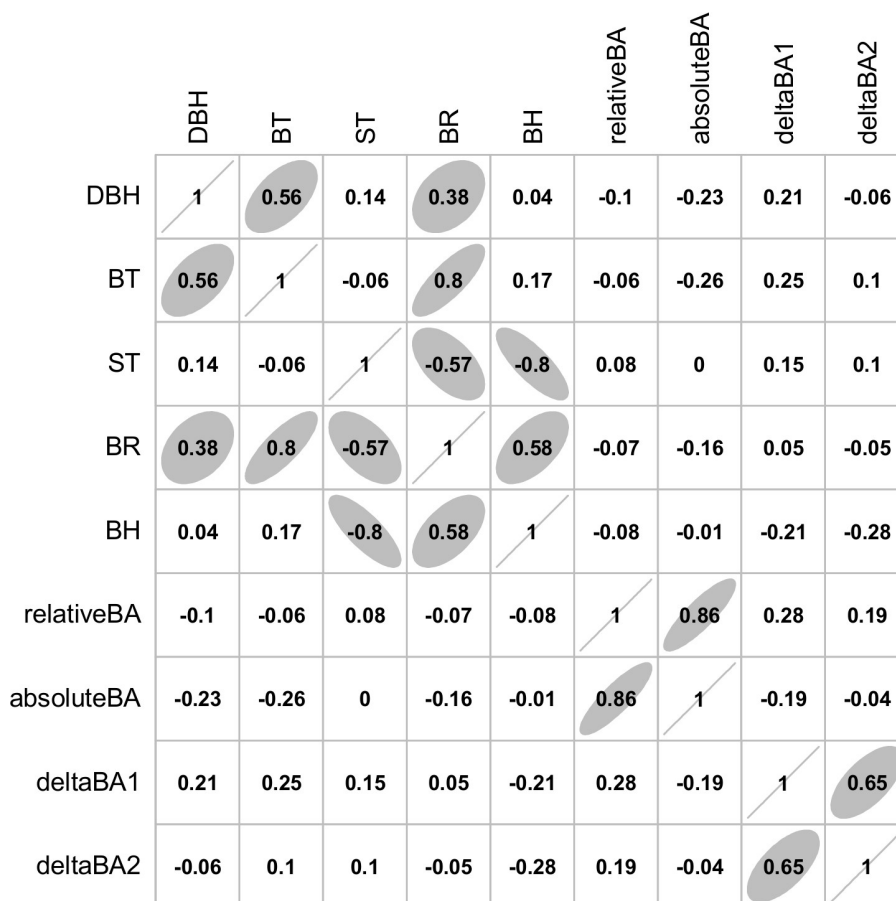

305 Fig. 7 Results of the Spearman's correlation analysis; when the rho values were statistically significant, an ellipse was shown, which represents the relation between the two variables

### 3.3 Comparison of the proposed architectural classification with previous studies

Recently, several classifications were proposed to identify some general architectural patterns in young oaks (Jensen & Löf, 2017; Kuehne et al., 2013). Those models were developed strictly to assess the wood quality of the future harvest trees. Tree forking was explicitly included in the classification by Kuehne et al. (2013); which consisted of four classes: monopodial, steeply-angled, forked and brushy trees. The classification by Jensen & Löf (2017) included forking only implicitly, in the dipodial class (the other two possible classes were: monopodial and multipodial). Nonetheles, the two classifications seem quite similar to each other; they also both account for the level of curvature in the main stem. In comparison with that studies, the classification proposed here is more complex, because it requires selection of particular branches or axes, that contribute to the horizontal crown extent in relation to a certain vertical plane (which also needs to be defined). However, the calssifications by Kuehne et al. (2013) and by Jensen & Löf (2017) principally focus on the main stem (i.e. whether branching affects the stem or not); while in the classification presented herein, the main focus is on the branches: their relative position and whether they are affected by forking or not. Therefore, the selection between the methods mentioned above would depend on the purpose of any possible study: if tree forking is to be assessed in more detail, then the proposed classification seems appropriate (with four different types of forked trees, namely models R.Af, R.Bf, R.C and R.D).

### 3.4 Qualitative vs. quantitative fork detection

In the qualitative TF analysis, when no measurements were taken, the shape of considered axes was crucial for the classification of a single ramification as forked or not. Most commonly, a forked branch was accompanied by a distinct, curvilinear shape of the other axis (Fig. 8, left). This pattern undoubtedly represented a fork (when both axes were vital, see Fig. 4c for an opposite example). However, for five branches, in trees of the R.B/Bf or R.C models (see Fig. S2), the quantitative analysis revealed that despite the main axis was clearly vertical (Fig. 8, right), the branching ratio well exceeded the  $2/3$  threshold (for two such branches it was higher than 0.8). It is known, that a branch may “escape” apical control in monopodial species (Groover, 2016); and oaks, because of the high wood density and firm branch attachment, are able to maintain very thick branches, growing horizontally from the vertical stem. Here, I propose not to classify such branches as forks, because they have no (or little) impact on the main axis shape. This implies that the

340 qualitative analysis was more robust than the quantitative one. Nonetheless, agreement between both methods was rather high (87%), and branching ratio may still be recognised a simple and useful measure of TF. Furthermore, inclusion of the branch and stem shape metrics (Mouliia et al., 2019; Mouliia & Fournier, 2009) in the quantitative analysis could potentially resolve described ambiguities.

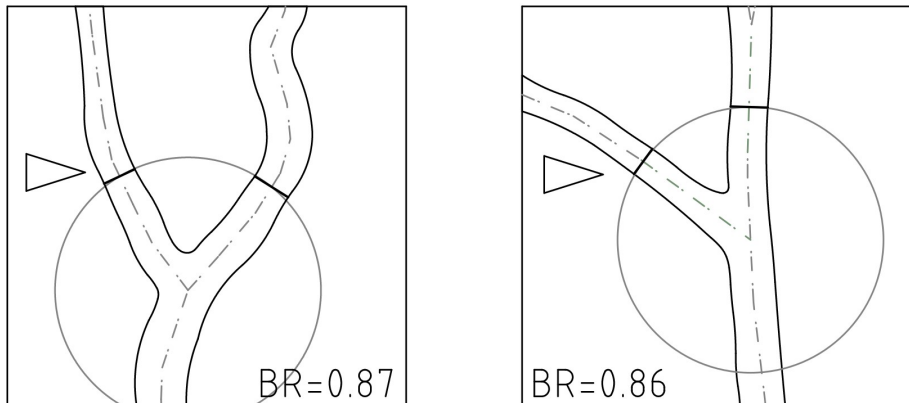

345 Fig. 8 Two oaks' branching outlines extracted with the SIP method; left: fork-qualified, right: non-fork qualified; quantitatively, in terms of the branching ratio (BR), the two junctions are roughly the same; other branches were omitted for clarity

### 3.5 Remarks on fork formation

350 Definitely, a separate, comprehensive review paper on fork formation in trees is needed; probably written by an interdisciplinary group of scientist dealing with plant growth and development, biomechanics, hydraulics and architecture. Herein, only some general remarks were made, in relation to the presented results.

355 Several cues point to a general finding, that the tree-level causes of fork formation dominated here over the shoot-level (traumatic) ones. First, two of the presented qualitative models seem to be most clear and stable, namely: the R.B and R.D models. Those models correspond to the well-known architectural patterns, displayed by, respectively: the sun-adapted and the shade-adapted individuals (Pickett & Kempf, 1980); and are somewhat similar to the Attim's and the Leeuwenberg's HO models, respectively (Hallé et al., 1978). Here, however, the light conditions were rather homogenous (northern slope of a hill); although, the past conditions of the trees' growth is 360 not known. Nonetheless, it is suspected, that the plot-scale differences in the oaks' growth



conditions may be rather linked with the varying topography and local water availability. Second, trees control their posture as a whole (Mouliya et al., 2019), and as they grow large, with heavy branches, the posture control must be an important issue. Third, the apical control may be weakened  
365 in older trees (Wilson, 2000). Finally, the traumatic fork origins in trees conforming to the fork-  
extrinsic architectural patterns; such as frost damage (Ningre & Colin, 2007) or herbivory, mainly  
affect young (and short) trees, staying close to the ground. In this study's canopy trees, only one tree  
displayed a clear (relatively recent) traumatism of the main axis, which led to forking (Fig. 4b);  
probably after a strong wind event. It seems that in most cases here, the forked junctions had been  
370 formed since the early times of branch emergence, as indicated by the distinct, curvilinear shape of  
both axes constituting the fork (Fig. 8, left). From the point of view of the whole-tree economics  
spectrum, it is suspected, that the "steep-angled fork arm may support a greater proportion of the  
entire canopy foliage, consequently producing a large proportion of the carbohydrates which can be  
allocated to trunk radial growth" (Colin et al., 2012). However, in this study, no differences in the  
375 branching angles were detected, between the forked and non-forked branches.

### 3.6 Considerations for future studies

Based on this study, several aspects of the presented methods could be modified in future investigations, not to reproduce some weaknesses revealed here; while other aspects deserve  
380 endorsement. Firstly, it is clear that in such old and somewhat crooked trees there is little chance to  
measure both main branches in case of every tree, following the presented methods. Furthermore,  
even if most of the target trees would undergo full measurements, there will still be a rather  
problematic nesting in the obtained data. Every two branches belonging to a particular tree are not  
fully independent from each other; and a group of two observations is much too small to be  
385 accounted for, e.g. in terms of random effects, by any modelling procedure. Therefore, it is  
suggested to either solely focus on a single main branch, or additionally select at least four other  
branches to be measured, in case of every tree. Those additional branches should be placed  
approximately within the same vertical plane as the main branch. To facilitate the workflow and to  
decrease uncertainty, it seems useful to mark all selected branches on to image taken, directly in the  
390 field (e.g. after opening the image with a portable tablet device). Secondly, the branch shape metrics  
could be improved to better represent crooked branches; this might be achieved by increasing the  
number of angle measurements per each branch (i.e. measuring branch angles at several distances  
from the branch insertion point). Thirdly, it is noted that the (free and open source) LibreCAD

software was here first used to digitize and measure tree architecture with the SIP method. The  
395 software performed very well, providing great tools, such as precise measurement options, polyline  
modifications, spline through points, efficient digital image support and a convenient printing facility.  
Lastly, branching ratio (BR) proved to be a useful architectural trait, which may be feasibly measured  
with the SIP method. The two measured diameters (BT and ST) are always close to each other, and  
the possible inaccuracies, coming from some displacements of the measured features from the  
400 theoretical projection plane, must reduce while calculating the ratio.

#### 4 Conclusion

The study provided both qualitative and quantitative analyses of thirty old-growth temperate  
oaks' forking habit; growing within a small, north-exposed forest remnant. A set of four possible  
405 qualitative models was preliminarily assumed, and finally extended to six models. These were based  
on the original Rauh's HO model; differing in the location of branches that contributed to the  
horizontal crown extent, and including forking of the main axis. Two of the models were most clearly  
represented by the studied oaks. It was found that the trees tended to either keep branches at  
varying heights, with no forks; or to iterate forking, with no major (non-fork) branches below the first  
410 fork. The two architectural patterns resemble other HO models, such as the Attim's model (with  
diffused branching) for non-forked trees; and the Leeuwenberg's model (with equivalent branching)  
in case of the forked trees. The quantitative analysis confirmed the applicability of the branch to  
parent stem diameter ratio to define a fork; however, a 13% disagreement was found between the  
qualitative and quantitative fork classifications. Branching ratio was positively correlated with both  
415 tree diameter and height of a branch above the ground, which is consistent with the previous study  
of Colin et al. (2012), based on much younger trees. It is concluded, that most probably the tree-level  
factors and phenomena, such as water supplies and posture control, played the key role in the  
studied oaks forking habit.

#### 420 Affiliation

PhD candidate at the Department of Forest Biodiversity, University of Agriculture in Krakow, Al. 29  
Listopada, Krakow 31-425, Poland; e-mail: [k.kedra@ur.krakow.pl](mailto:k.kedra@ur.krakow.pl)

## References

- 425 Barthélémy D & Caraglio Y (2007) Plant architecture: A dynamic, multilevel and comprehensive approach to plant form, structure and ontogeny. *Annals of Botany* 99: 375-407. doi:10.1093/aob/mcl260.
- Bayer D, Seifert S & Pretzsch H (2013) Structural crown properties of Norway spruce (*Picea abies* L. Karst.) and European beech (*Fagus sylvatica* L. ) in mixed versus pure stands revealed by  
430 terrestrial laser scanning. *Trees-Structure and Function* 27: 1035-1047. doi:10.1007/s00468-013-0854-4.
- Bell AD (1991) *Plant form: an illustrated guide to flowering plant morphology*. Oxford University Press, Oxford.
- Burkardt K, Annighöfer P, Seidel D, Ammer C & Vor T (2019) Intraspecific competition affects crown  
435 and stem characteristics of non-native *Quercus rubra* L. stands in Germany. *Forests* 10: 846.
- Chaar H & Colin F (1999) Impact of late frost on height growth in young sessile oak regenerations. *Annals of Forest Science* 56: 417-429. doi:10.1051/forest:19990506.
- Colin F, Ningre F, Fortin M & Huet S (2012) Quantification of *Quercus petraea* Liebl. forking based on  
440 a 23-year-long longitudinal survey. *Forest Ecology and Management* 282: 133-141. doi:10.1016/j.foreco.2012.06.040.
- Collet C, Fournier M, Ningre F, Hounzandji API & Constant T (2011) Growth and posture control strategies in *Fagus sylvatica* and *Acer pseudoplatanus* saplings in response to canopy disturbance. *Annals of Botany* 107: 1345-1353. doi:10.1093/aob/mcr058.
- Fox J & Weisberg S (2019) *An {R} Companion to Applied Regression*. Sage, Thousand Oaks {CA}.
- 445 Gazda A & Gazda M (2010) The size structure of Turk's-cap lily *Lilium martagon* from the "Las Krzyszkowicki" near Krakow (S Poland). *Chrońmy Przyrodę Ojczystą* 66: 376-383.
- Gazda A & Kędra K (2017) Tree architecture description using a single-image photogrammetric method. *Dendrobiology* 78: 124-135. doi:10.12657/denbio.078.012.
- Gomory D, Yakovlev I, Zhelev P, Jedinakova J & Paule L (2001) Genetic differentiation of oak  
450 populations within the *Quercus robur*/*Quercus petraea* complex in Central and Eastern Europe. *Heredity* 86: 557-563. doi:10.1046/j.1365-2540.2001.00874.x.
- Groover A (2016) Gravitropisms and reaction woods of forest trees - evolution, functions and mechanisms. *New Phytologist* 211: 790-802. doi:10.1111/nph.13968.
- Hallé F & Oldeman RAA (1970) *Essai sur l'Architecture et la Dynamique de Croissance des Arbres*  
455 *Tropicaux*: Paris, Masson, p. 178.

- Hallé F, Oldeman RAA & Tomlinson PB (1978) Tropical trees and forests: an architectural analysis. Springer-Verlag, Berlin.
- Jensen AM & Löf M (2017) Effects of interspecific competition from surrounding vegetation on mortality, growth and stem development in young oaks (*Quercus robur*). *Forest Ecology and Management* 392: 176-183. doi:10.1016/j.foreco.2017.03.009.
- 460
- Kuehne C, Kublin E, Pyttel P & Bauhus J (2013) Growth and form of *Quercus robur* and *Fraxinus excelsior* respond distinctly different to initial growing space: results from 24-year-old Nelder experiments. *Journal of Forestry Research* 24: 1-14. doi:10.1007/s11676-013-0320-6.
- Kędra K, Barbeito I, Dassot M, Vallet P & Gazda A (2019) Single-image photogrammetry for deriving tree architectural traits in mature forest stands: a comparison with terrestrial laser scanning. *Annals of Forest Science* 76. doi:10.1007/s13595-018-0783-x.
- 465
- Kędra K, Barbeito I & Gazda A (2016) New angular competition index and tree crown projection model. 2016 IEEE International Conference on Functional-Structural Plant Growth Modeling, Simulation, Visualization and Applications (FSPMA): 106-109.
- 470
- Liang XL, Wang YS, Pyorala J, Lehtomaki M, Yu XW, Kaartinen H, Kukko A, Honkavaara E, Issaoui AEI, Nevalainen O, Vaaja M, Virtanen JP, Katoh M & Deng SQ (2019) Forest in situ observations using unmanned aerial vehicle as an alternative of terrestrial measurements. *Forest Ecosystems* 6. doi:10.1186/s40663-019-0173-3.
- Moulia B, Bastien R, Chauvet-Thiry H & Leblanc-Fournier N (2019) Posture control in land plants: growth, position sensing, proprioception, balance, and elasticity. *Journal of Experimental Botany* 70: 3467-3494. doi:10.1093/jxb/erz278.
- 475
- Moulia B & Fournier M (2009) The power and control of gravitropic movements in plants: a biomechanical and systems biology view. *Journal of Experimental Botany* 60: 461-486. doi:10.1093/jxb/ern341.
- 480
- Ningre F (1997) A methodological definition of forking in young beech trees. *Rev. For. Fr.:* 32–40.
- Ningre F & Colin F (2007) Frost damage on the terminal shoot as a risk factor of fork incidence on common beech (*Fagus sylvatica* L.). *Annals of Forest Science* 64: 79-86. doi:10.1051/forest:2006091.
- Oldeman RAA (1990) *Forests: elements of silvology*. Springer-Verlag.
- 485
- Pickett STA & Kempf JS (1980) Branching patterns in forest shrubs and understory trees in relation to habitat. *New Phytologist* 86: 219-228. doi:10.1111/j.1469-8137.1980.tb03191.x.
- Pyorala J, Liang XL, Saarinen N, Kankare V, Wang YS, Holopainen M, Hyyppä J & Vastaranta M (2018) Assessing branching structure for biomass and wood quality estimation using terrestrial laser

- scanning point clouds. *Canadian Journal of Remote Sensing* 44: 462-475.
- 490        doi:10.1080/07038992.2018.1557040.
- QGIS Development Team (2016) QGIS Geographic Information System. Open Source Geospatial Foundation Project.
- R Core Team (2017) R: A language and environment for statistical computing: R Foundation for Statistical Computing, Vienna, Austria.
- 495        Saenz-Romero C, Lamy JB, Ducouso A, Musch B, Ehrenmann F, Delzon S, Cavers S, Chalupka W, Dagdas S, Hansen JK, Lee SJ, Liesebach M, Rau HM, Psomas A, Schneck V, Steiner W, Zimmermann NE & Kremer A (2017) Adaptive and plastic responses of *Quercus petraea* populations to climate across Europe. *Global Change Biology* 23: 2831-2847.
- doi:10.1111/gcb.13576.
- 500        Slater D & Ennos R (2015) Interlocking wood grain patterns provide improved wood strength properties in forks of hazel (*Corylus avellana* L.). *Arboricultural Journal* 37: 21-32.
- doi:10.1080/03071375.2015.1012876.
- Wei T & Simko V (2017) R package "corrplot": Visualization of a Correlation Matrix (Version 0.84).
- Wilson BF (2000) Apical control of branch growth and angle in woody plants. *American Journal of Botany* 87: 601-607. doi:10.2307/2656846.
- 505

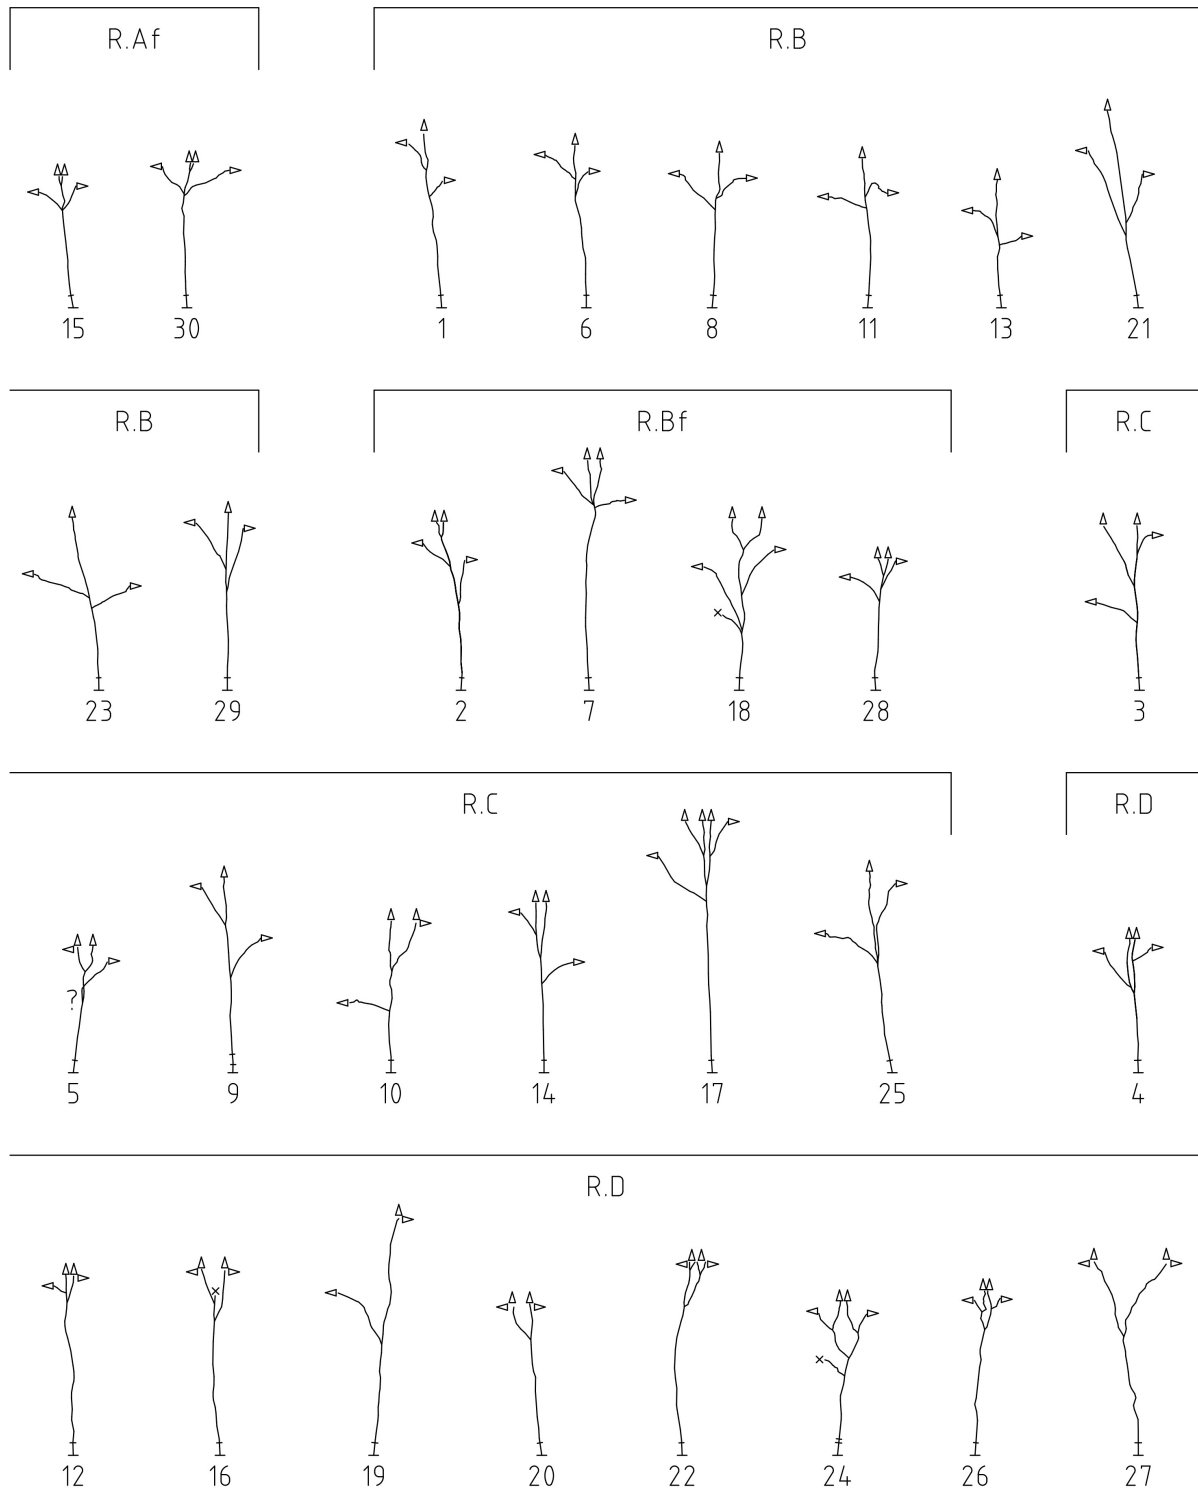

Fig. S1 The thirty trees' main construction (main axes and main branches), assigned to the presented  
510 qualitative models (R.A-D); the pointers indicate whether an axis contributes to the vertical,  
horizontal or both directions of crown extent; the short lines, just above the stem bases, represent  
stem diameters

Tree 1 (R.B); DBH=49cm  
BH=14.3m; BR=0.60

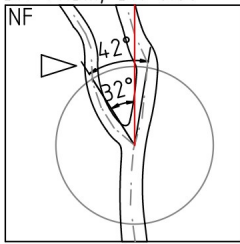

Tree 1 (R.B); DBH=49cm  
BH=11.6m; BR=0.18

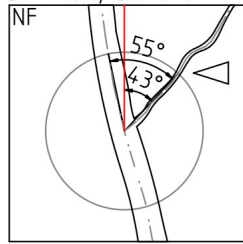

Tree 2 (R.Bf); DBH=46cm  
BH=12.8m; BR=0.47

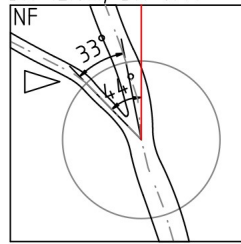

Tree 2 (R.Bf); DBH=46cm  
BH=8.9m; BR=0.33

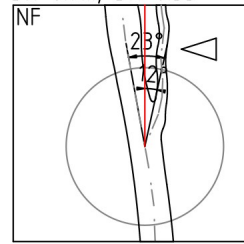

Tree 3 (R.C); DBH=52cm  
BH=14.1m; BR=0.49

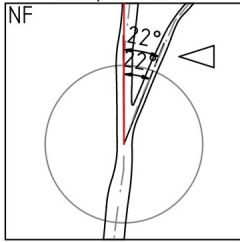

Tree 3 (R.C); DBH=52cm  
BH=7.0m; BR=0.34

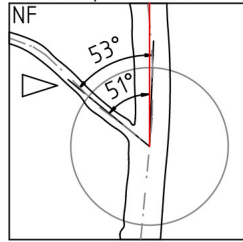

Tree 4 (R.D); DBH=68cm  
excluded

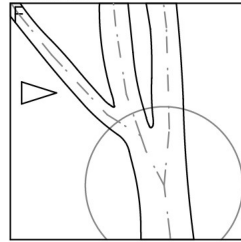

Tree 4 (R.D); DBH=68cm  
excluded

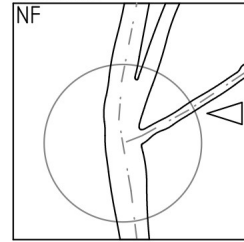

Tree 5 (R.C); DBH=50cm  
BH=10.5m; BR=0.87

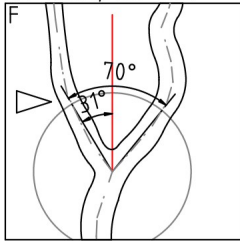

Tree 6 (R.B); DBH=53cm  
BH=13.4m; BR=0.32

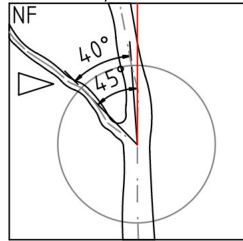

Tree 6 (R.B); DBH=53cm  
BH=11.7m; BR=0.65

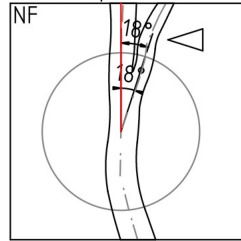

Tree 7 (R.Bf); DBH=62cm  
excluded

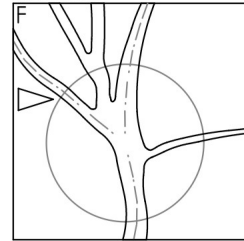

Tree 7 (R.Bf); DBH=62cm  
excluded

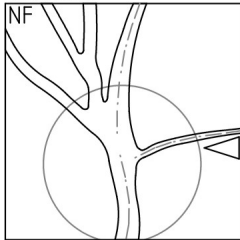

Tree 8 (R.B); DBH=61cm  
excluded

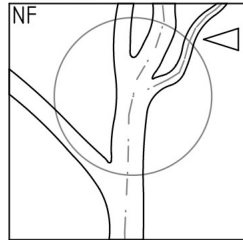

Tree 8 (R.B); DBH=61cm  
BH=10.2m; BR=0.62

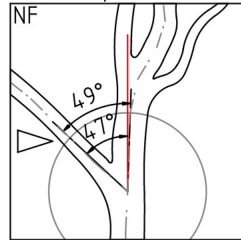

Tree 9 (R.C); DBH=53cm  
BH=15.3m; BR=0.85

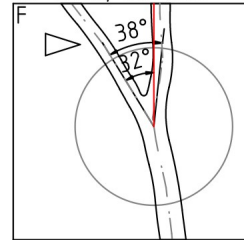

Tree 9 (R.C); DBH=53cm  
BH=9.9m; BR=0.44

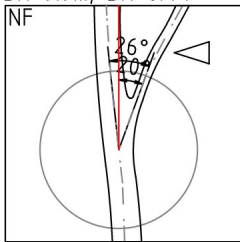

Tree 10 (R.C); DBH=53cm  
excluded

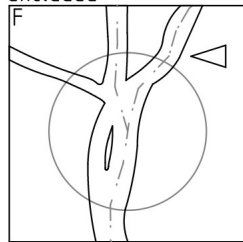

Tree 10 (R.C); DBH=53cm  
BH=6.4m; BR=0.34

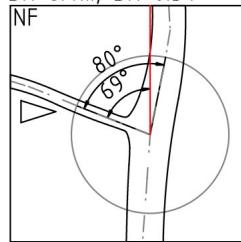

Tree 11 (R.B); DBH=54cm  
BH=11.5m; BR=0.29}

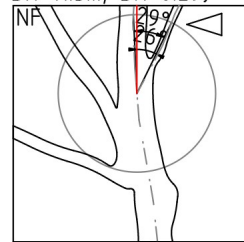

Tree 11 (R.B); DBH=54cm  
excluded

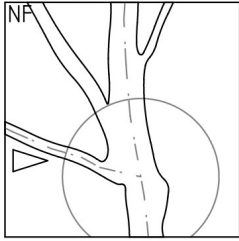

Tree 12 (R.D); DBH=61cm  
BH=16.9m; BR=1.00

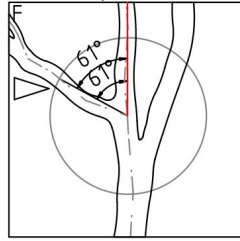

Tree 12 (R.D); DBH=61cm  
BH=15.9m; BR=0.91

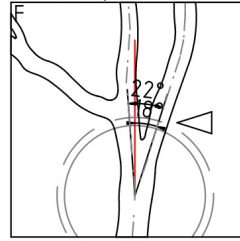

Tree 13 (R.B); DBH=49cm  
BH=7.4m; BR=0.66

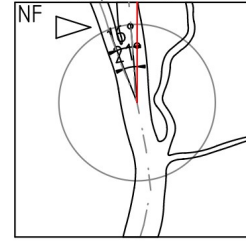

Tree 13 (R.B); DBH=49cm  
excluded

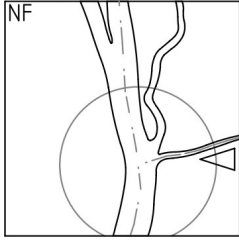

Tree 14 (R.C); DBH=48cm  
BH=14.3m; BR=0.83

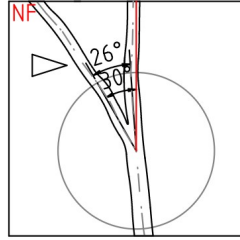

Tree 14 (R.C); DBH=48cm  
BH=9.3m; BR=0.34

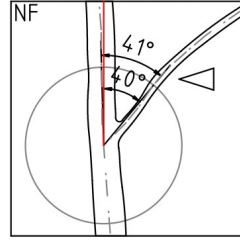

Tree 15 (R.Af); DBH=52cm  
excluded

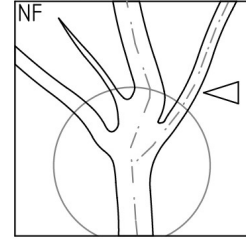

Tree 15 (R.Af); DBH=52cm  
excluded

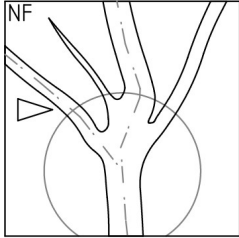

Tree 16 (R.D); DBH=55cm  
BH=13.9m; BR=0.97

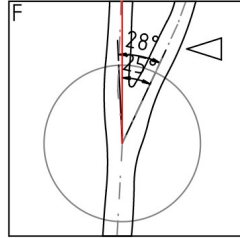

Tree 16 (R.D); DBH=55cm  
excluded

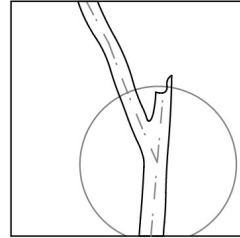

Tree 17 (R.C); DBH=53cm  
BH=19.4m; BR=0.93

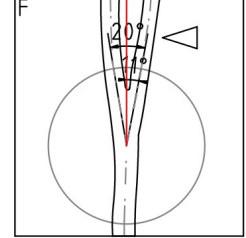

Tree 17 (R.C); DBH=53cm  
BH=17.8m; BR=0.86

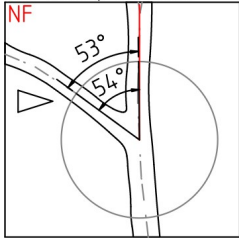

Tree 18 (R.Bf); DBH=68cm  
BH=9.9m; BR=0.80

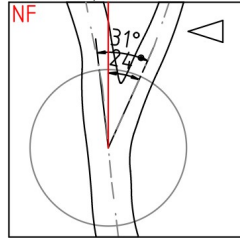

Tree 18 (R.Bf); DBH=68cm  
BH=6.2m; BR=0.68

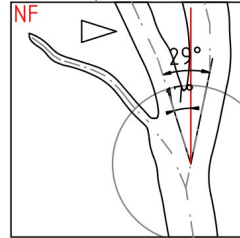

Tree 19 (R.D); DBH=63cm  
excluded

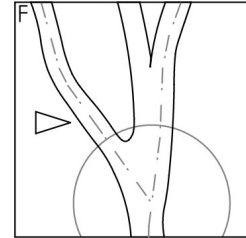

Tree 20 (R.D); DBH=55cm  
BH=12.0m; BR=0.98

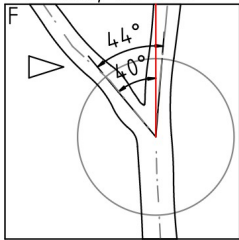

Tree 21 (R.B); DBH=52cm  
BH=8.8m; BR=0.32

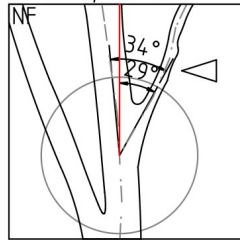

Tree 21 (R.B); DBH=52cm  
BH=7.5m; BR=0.52

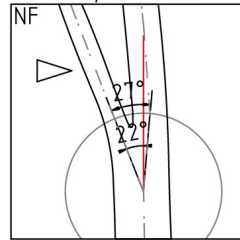

Tree 22 (R.D); DBH=51cm  
BH=15.5m; BR=0.98

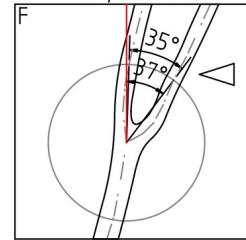



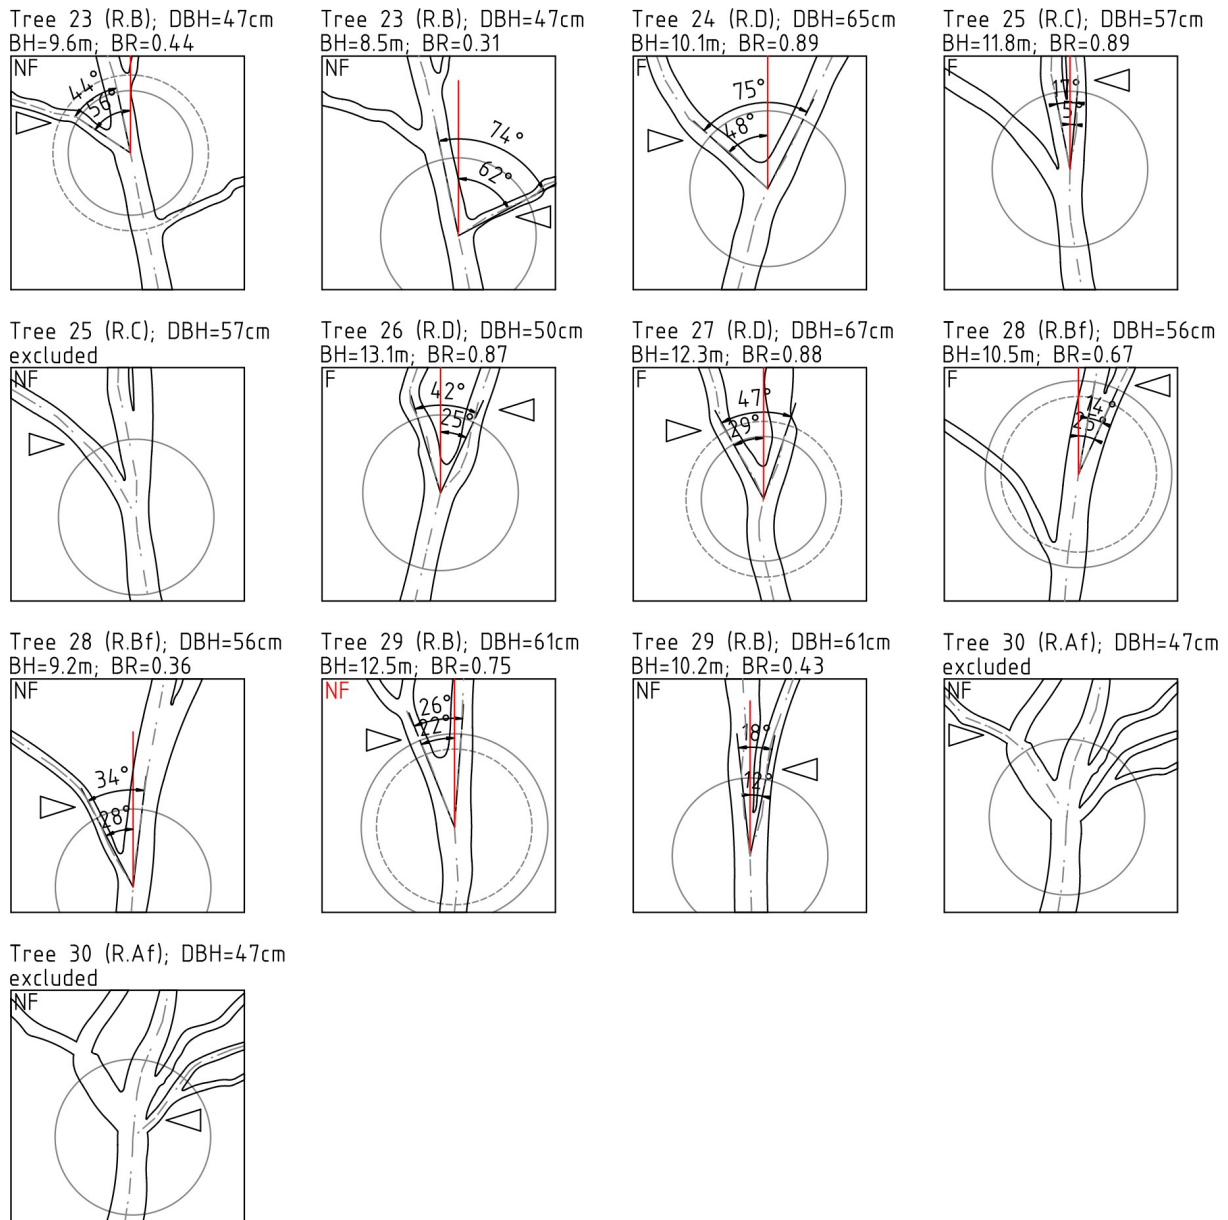

Fig. S2 The fifty three branches (marked with triangles) analysed with the SIP method; the  
 520 descriptions include: tree-level data (top lines): tree number (1 to 30), qualitative model (R.A-D),  
 diameter at breast height (DBH); branch-level data (bottom lines): branch height (BH) and branching  
 ratio (BR) or “excluded” if the branch was excluded from the quantitative analysis (mostly when  
 there was another branch or branches at the distance of 1 m from the target branch insertion point);  
 the letters in the top-left corners of the bounding boxes (3 x 3 m each) indicate qualitative branch  
 525 assessments: fork (F) or non-fork (NF): in red when there was an ambiguity between quantitative and  
 qualitative results (in five cases)
